# Supplementary material
Source: PubMed Central journal article supplement (PMC3019697)
Supplement: supp_77_1_269__1.pdf [file supp_77_1_269__1.pdf]

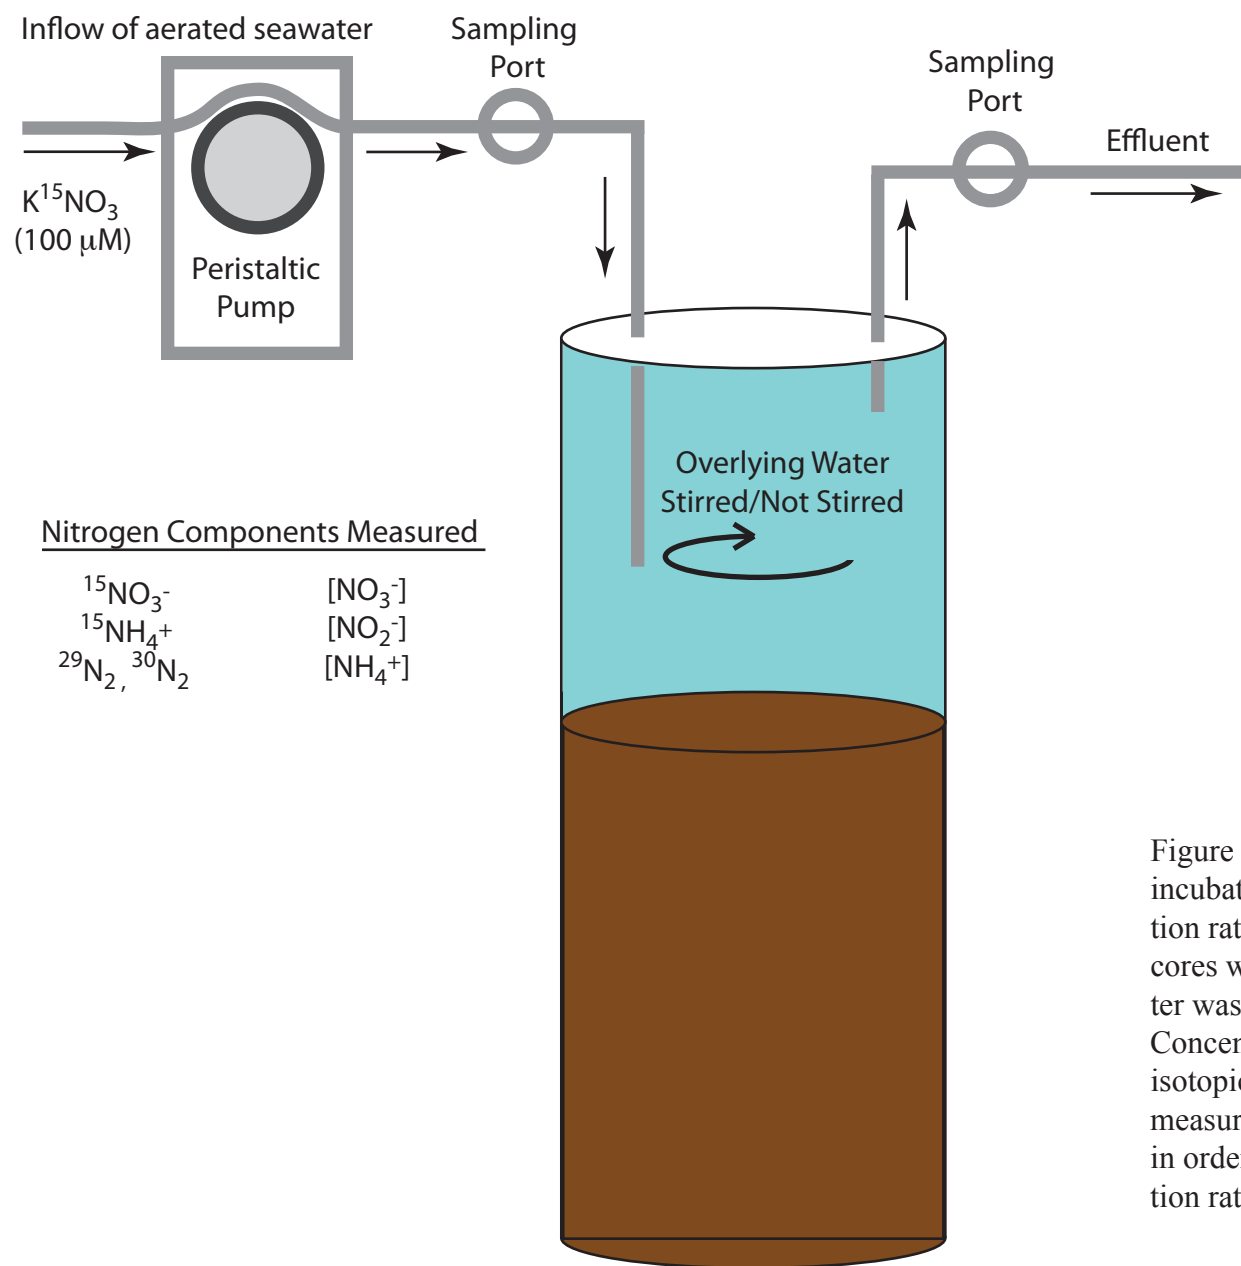

Figure S1. Schematic of experimental core incubation system used for flux and N transformation rate measurements. During the experiment cores were kept in the dark at 15°C. Feed seawater was amended with isotopically labeled  $^{15}\text{NO}_3^-$ . Concentrations of  $\text{NO}_3^-$ ,  $\text{NO}_2^-$  and  $\text{NH}_4^+$  and isotopic composition of  $\text{NO}_3^-$ ,  $\text{NH}_4^+$  and  $\text{N}_2$  were measured at the inflow and outflow of each core in order to calculate aerial fluxes and transformation rates (see text for specific details).
